# Supplementary material
Source: Springer Nature journal article supplement (https://www.springermedizin.de/resource/supplementary/13229_2009_9_MOESM4_ESM.pdf/9676008)
Supplement: MOESM4 [file 9676008]

|                       |                                                                       |      |
|-----------------------|-----------------------------------------------------------------------|------|
| <b>Homo</b>           | CCCGGAGGGT <b>G</b> GAGATTGCCGCCACCCTGGAGCTCA-ATGAAACACAGGTCAAGATTTGG | 1808 |
| <b>Pan</b>            | CCCGGAGGGT <b>G</b> GAGATTGCCGCCACCCTGGAGCTCA-ATGAAACACAGGTCAAGATTTGG | 1808 |
| <b>Mus</b>            | CCCGGAGGGT <b>G</b> GAGATCGCCGCCACCCTGGAGCTCA-ATGAAACGCAGGTGAAGATCTGG | 1826 |
| <b>Rattus</b>         | CCCGGAGGGT <b>G</b> GAGATCGCCGCTACCCTGGAGCTCA-ATGAAACGCAGGTGAAGATCTGG | 1774 |
| <b>Gallus</b>         | CCCCCAGGTGAGCACGGAACAGCGCACGGCGAAGAG-TCGGGGAGGAGCGAAAAGTTCGG          | 1869 |
| <b>Xenopus</b>        | CCAGGAGAGT <b>G</b> GAGATCGCCGCCACCCTGGAAGTGA-ACGAAACCCAAGTAAAAATATGG | 744  |
| <b>Tetraodon</b>      | TATTCACTATAAATGCATCCGTTTTACTGAAAAAGAGACAAAAATAAATTAAAAATACAT          | 1856 |
| <b>Caenorhabditis</b> | TTTACATTTTCATTGATGTACCTGCCTCTGTAGGTAC-GTGAG---TAGGTATAAGATTGG         | 1948 |

\* \* \* \* \*

\* \*

|                       |                                                                       |      |
|-----------------------|-----------------------------------------------------------------------|------|
| <b>Homo</b>           | AGTCGACATGCACC <b>TC</b> CCCGGA--AGCCTCACCCAGCTCTGTACCTCCTGAACTGAACC  | 1972 |
| <b>Pan</b>            | AGTCGACATGCACC <b>TC</b> CCCGGA--AGCCTCACCCAGCTCTGTACCTCCTGAACTGAACC  | 1972 |
| <b>Mus</b>            | AGTCCGCGTGCACC <b>TC</b> CCCGGA--AGCCTCGCCAGTTCATCACCTCTTGAATTGAACC   | 1990 |
| <b>Rattus</b>         | AGTCTGCGTGCACC <b>TC</b> CCCGGA--AGCTTCGCCCAGTTCATCACCTCTTAAATTGAACC  | 1938 |
| <b>Gallus</b>         | CTTACATATGTAACCC <b>CT</b> CCCG--GGCTTCCCCCTTCACCCCATTCCTTTGCCTG--CC  | 2037 |
| <b>Xenopus</b>        | TGTCCAGTTCAACC <b>TC</b> CCCGGA--TGCCTCTCCCAACTCAGT-GTAGCACAAGCAA---- | 897  |
| <b>Tetraodon</b>      | TTTTTTTTTAATATT <b>TC</b> TTTAAATGAGCCATTTTATCACTATTACGATTCAAAACATTTA | 2035 |
| <b>Caenorhabditis</b> | TGCTAGAATAAACT <b>T</b> TTATAAATATGTTCCAATAATTTGAGCAACAATTAACATCTCA   | 2128 |
